# Supplementary material for: An RNA-Seq Strategy to Detect the Complete Coding and Non-Coding Transcriptome Including Full-Length Imprinted Macro ncRNAs
Source: PubMed Central journal article supplement (PMC3213133; doi:10.1371/journal.pone.0027288), 2011-11-10

Figure S1

A

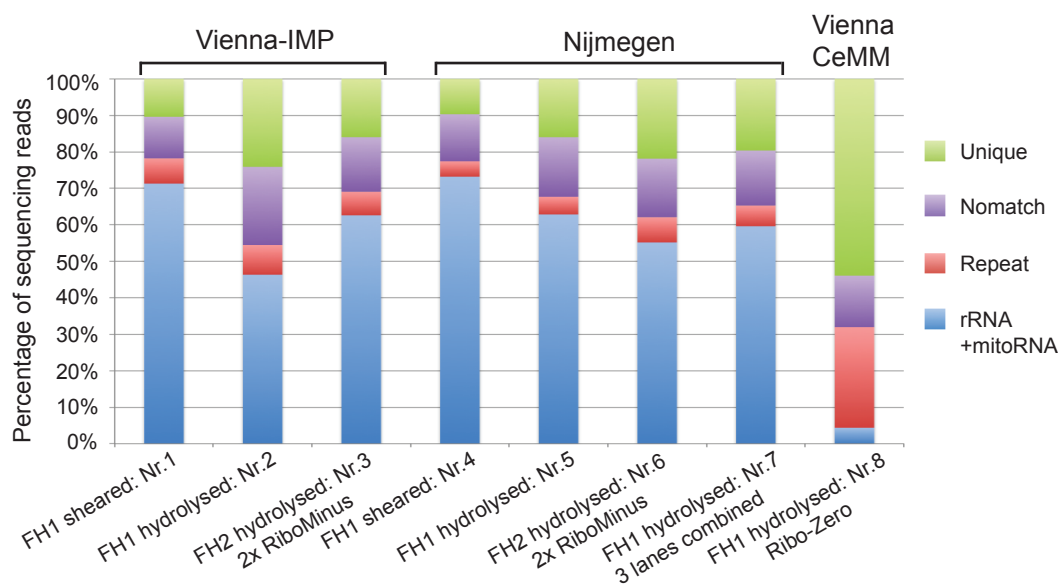

B

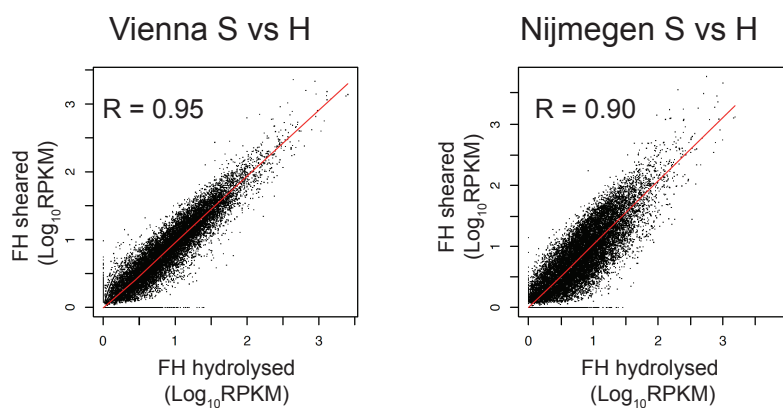

C

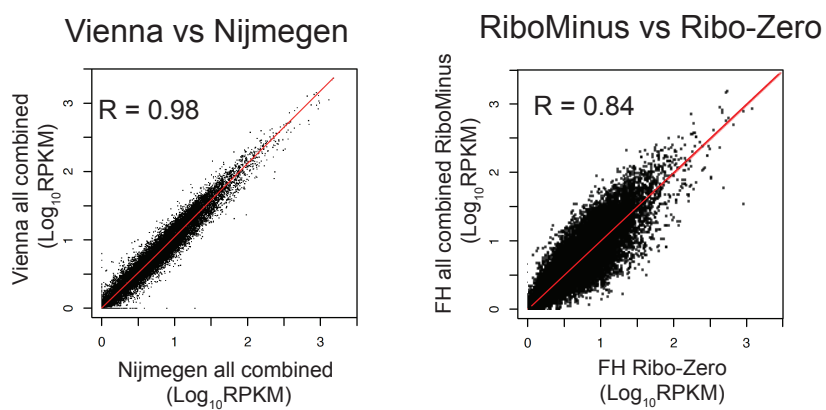

Supplement: pone.0027288.s001.pdf [file pone.0027288.s001.pdf]
